# Supplementary material for: Hemoadsorption with CytoSorb shows a decreased observed versus expected 28-day all-cause mortality in ICU patients with septic shock: a propensity-score-weighted retrospective study
Source: Springer Nature journal article supplement (doi:10.1186/s13054-019-2588-1), 2019-09-18
Supplement: MOESM1 [file 17185526]

### Absolute standardized differences between CRRT and CytoSorb for variables before and after weighting

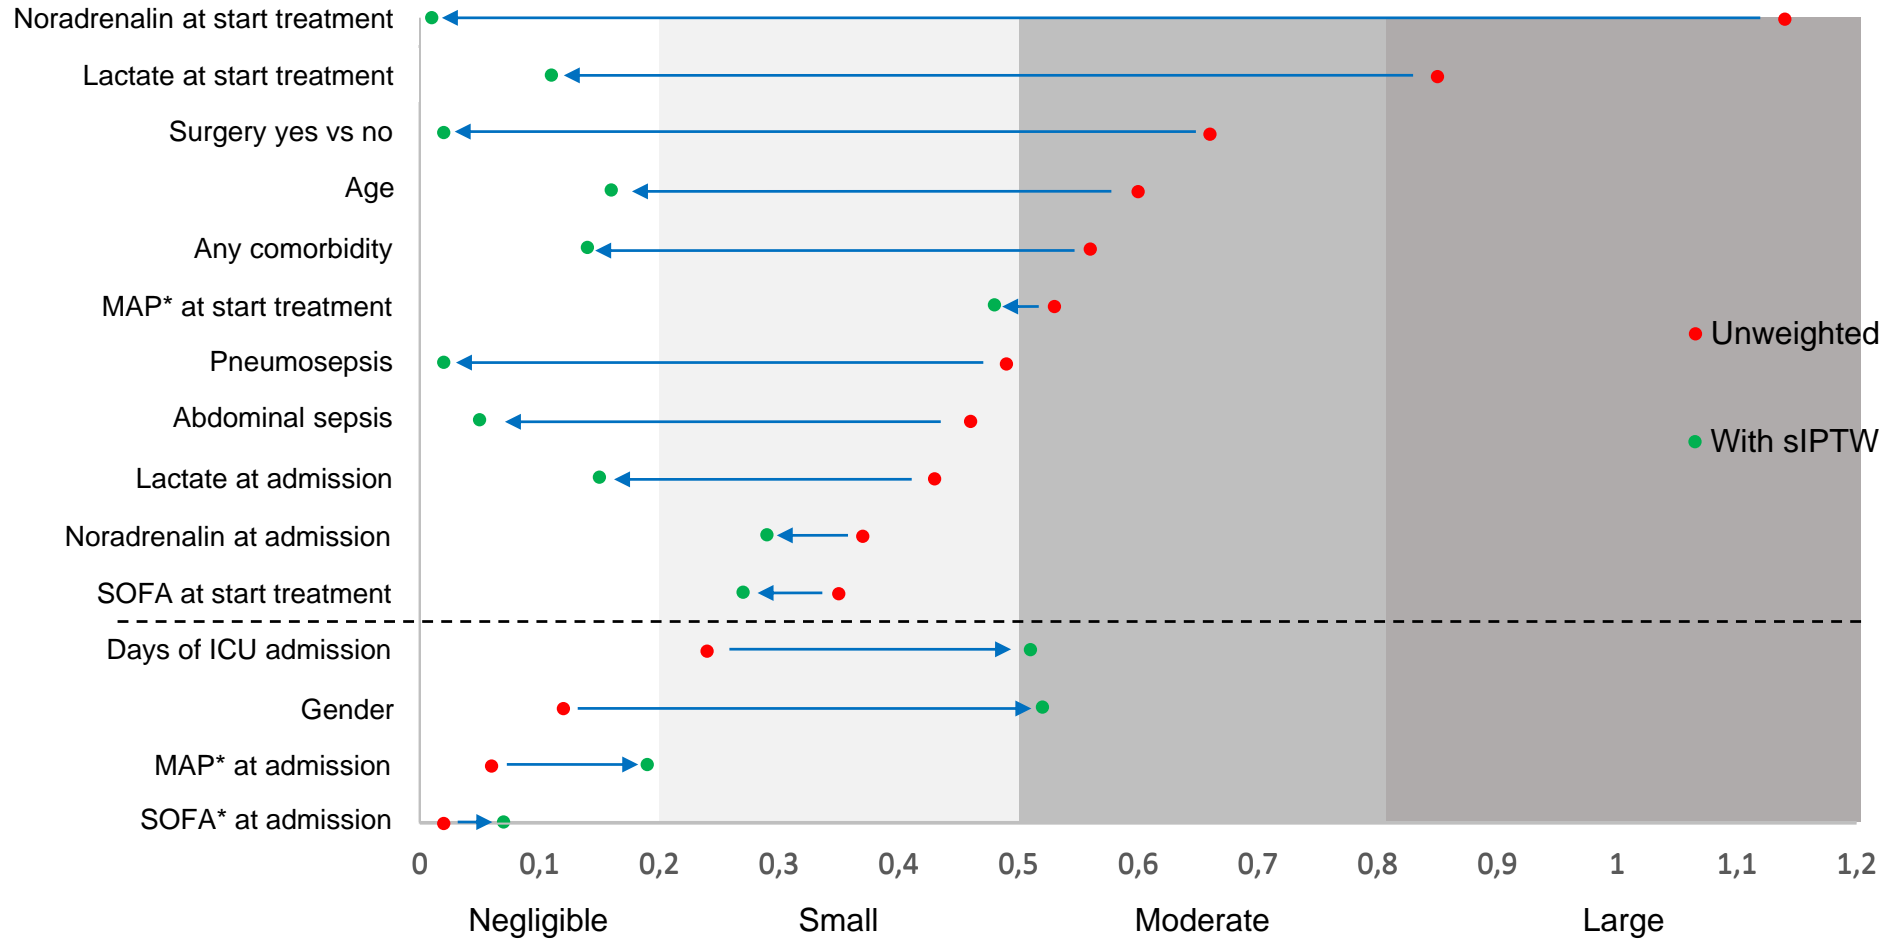

### Absolute Standardized Difference (x100%)

Red rounds represent the absolute standardized difference for the variables of interest without applying weights. Green rounds represent the absolute standardized difference after sIPTW. Blue arrows show the direction of improvement (right to left) or deterioration (left to right). Moreover, the white – grey areas represent the significance of the difference observed according to Cohen et al. (1977). \*MAP, mean arterial pressure.

#### sIPTW characteristics:

Median weight CRRT: 0.424, interquartile range 0.385 – 0.615

Median weight CytoSorb: 0.717, interquartile range 0.669 – 0.994
